# Supplementary material for: Feasibility Study for a Randomised Controlled Trial for the Topical Treatment of Impetigo in Australian General Practice
Source: MDPI journal article supplement (doi:10.3390/tropicalmed6040197), 2021-11-09
Supplement: s1 [file s1]

Patient Record Number: \_\_\_\_\_

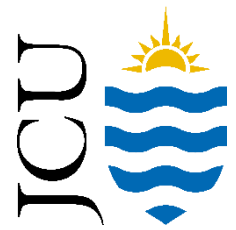

Registration form: To all participating medical practitioners and practice nurses, please kindly fill in this form for all consented patients with impetigo and those who do not meet the exclusion criteria:

- |                                                       |                                                                             |
|-------------------------------------------------------|-----------------------------------------------------------------------------|
| 1. <2 years                                           | 6. Allergy to Mupirocin, hydrogen peroxide, soft white paraffin             |
| 2. $\geq 4$ skin lesions                              | 7. Currently on antibiotics or using topical treatment in the last 48 hours |
| 3. Systemically unwell (e.g. fever, nausea, vomiting) | 8. Underlying skin disease (e.g. eczema, scabies)                           |
| 4. ATSI background                                    | 9. Immunocompromised                                                        |
| 5. Lesions unable to be covered with dressing         | 10. Significant language barrier                                            |

**Date:** \_\_\_\_\_

**Consent Form Completed**

Yes ☐ No ☐

**Demographic**

Patient Age (years): \_\_\_\_\_

Patient Gender: Female ☐ Male ☐ Other ☐

Ethnicity: \_\_\_\_\_

Occupation: \_\_\_\_\_

Smoker ☐ Non-smoker ☐

Co-morbidities (e.g. diabetes, PVD):

\_\_\_\_\_

Current medications:

\_\_\_\_\_

Patient Record Number: \_\_\_\_\_

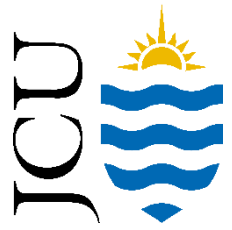

**Symptoms**

1. Number of lesions: \_\_\_\_\_
2. Site of lesions

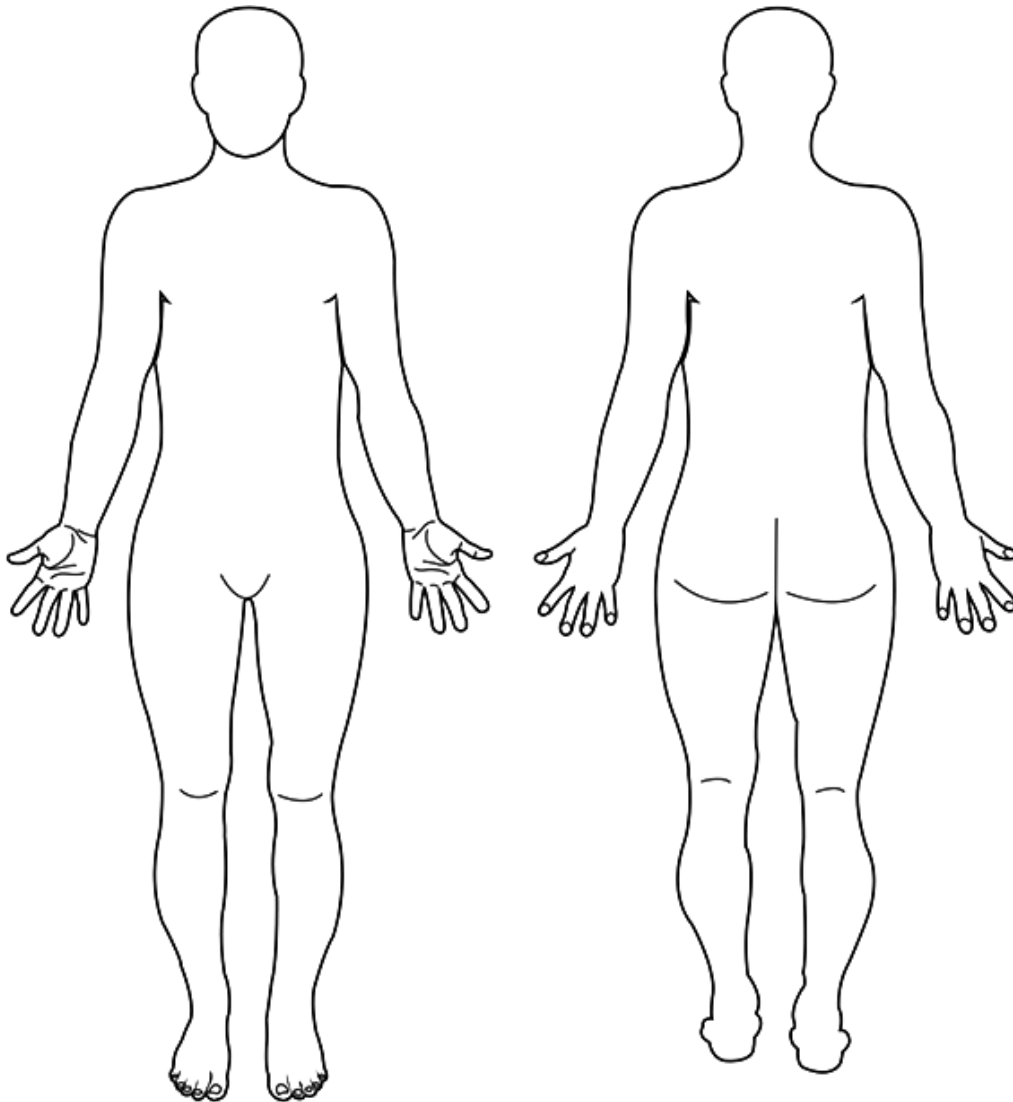

Treatment Allocation (envelope number): \_\_\_\_\_

Baseline Photo File #: \_\_\_\_\_

Wound Swab MCS taken:      Yes      ☐      No      ☐

Verbal Treatment Explanation: Yes      ☐      No      ☐

Treatment Diary given:      Yes      ☐      No      ☐

Patient Record Number: \_\_\_\_\_



**Review Appointment**

Date: \_\_\_\_\_

Improved: ☐

*Decrease in size of affected area or number of lesions or both such that no further treatment is required.*

Not Improved: ☐

*Further treatment required.*

Details:

---

---

Reviewed early: ☐

Date

Reason (e.g. adverse reaction, not improved – fill in above):

---

---

Adverse reaction: ☐

Details: \_\_\_\_\_

Review Photo File #: \_\_\_\_\_

Culture: \_\_\_\_\_

Sensitivities (resistance if any):

---

---

Treatment Diary returned: ☐
